# Supplementary material
Source: Springer Nature journal article supplement (https://www.springermedizin.de/resource/supplementary/13012_2010_318_MOESM2_ESM.pdf/9629856)
Supplement: MOESM2 [file 9629856]

FMG OUTPATIENTS/WALK-IN CLINICS

Participating FP

Patient recruitment  
Five patients per FP

*Baseline measures*

**CLINICAL ENCOUNTER**

*Postencounter  
measures (FP)*

*Postencounter  
measures (PT)*

*To study's next step*

One-week telephone  
follow-up
